# Supplementary material for: A triflate and alkynyl protected Ag43 nanocluster with a passivated surface
Source: Royal Society of Chemistry journal article supplement (doi:10.1039/d0ra01244k), 2020-01-01
Supplement: d0ra01244k1.pdf [file d0ra01244k1.pdf]

## Supporting Information

# A Triflate and Alkynyl Protected Ag<sub>43</sub> Nanocluster with Passivated Surface

Ting Li,<sup>a</sup> § Xiaoqin Cui,<sup>b</sup> § Linfeng Liang,<sup>b</sup> Cui Luo,<sup>b</sup> Huan Li,<sup>b\*</sup> Xian-Ming Zhang,<sup>ab\*</sup>

<sup>a</sup>School of Chemistry & Material Science, Shanxi Normal University, Linfen, 041000, China

<sup>b</sup>Institute of Crystalline Materials, Shanxi University, Taiyuan, 030006, China

§ These authors contributed equally to this work.

**Corresponding authors:** 59584340@sxu.edu.cn (H. Li) xmzhang@sxu.edu.cn (X.-M. Zhang)

## Experimental section

### 1 Materials

*Tert*-butylacetylene ( $t\text{BuC}\equiv\text{C}$ , 98%) and 1,4-bis-(diphenylphosphino)butane(dppb, 97%) were purchased from Shanghai Macklin Biochemical Co., Ltd (China), silver trifluoromethanesulfonate (AgOTf, 99.8%) and sodium borohydride ( $\text{NaBH}_4$ , 98%) were from Energy Chemical (Shanghai, China). All chemicals and solvents were used as received.

### 2 Instruments

FT-IR spectra were collected on Nicolet iS5 with samples prepared as KBr pellets.

UV-Vis absorption was tested on a domestic spectrophotometer with samples being dispersed in  $\text{CH}_2\text{Cl}_2$ .

Emission spectra were measured on an Edinburgh FLS-920 equipment in solution at room temperature.

X-ray Crystallography. Data collection for  $\text{Ag}_{43}(t\text{BuC}\equiv\text{C})_{24}(\text{CF}_3\text{SO}_3)_8$  was carried on an Agilent Technologies SuperNova Single Crystal Diffractometer using  $\text{Cu K}\alpha$  radiation ( $\lambda = 1.54178 \text{ \AA}$ ) at 150 K. Absorption corrections were applied by using the program CrysAlis (multi-scan).<sup>1</sup> The structure was solved and refined using Full-matrix least-squares based on  $F^2$  with program SHELXS-97 and SHELXL-97 within OLEX2.<sup>2</sup>

### 3 Synthesis of $\text{Ag}_{43}(t\text{BuC}\equiv\text{C})_{24}(\text{CF}_3\text{SO}_3)_8$ ( $\text{Ag}_{43}$ )

Silver trifluoromethanesulfonate (51 mg, 0.2 mmol) was dissolved in ethanol (2 mL), then a  $\text{CH}_2\text{Cl}_2$  solution (2 mL) containing dppb (1,3-bis(diphenylphosphino)butane, 26 mg, 0.1 mmol) and *tert*-butylacetylene (14  $\mu\text{L}$ , 0.1 mmol) was added under vigorous stirring. A freshly prepared solution of  $\text{NaBH}_4$  (0.1 mmol in 1 mL of ethanol) was added dropwise after 35  $\mu\text{L}$  triethylamine was introduced. Upon reduction, the solution changed from colorless to light yellow. The reaction was then aged for 12 hours at ambient conditions, during which the color turned dark green. The mixture was evaporated to dryness to give a dark solid, which was dissolved in  $\text{CH}_2\text{Cl}_2$  (2 mL) again. The solution was centrifuged for 5 min at 12000 r/min. The supernatant solution was subject to the diffusion with *n*-hexane and diethyl ether (volume ratio, 1:1) to afford black green block crystals after one week.

## Characterization

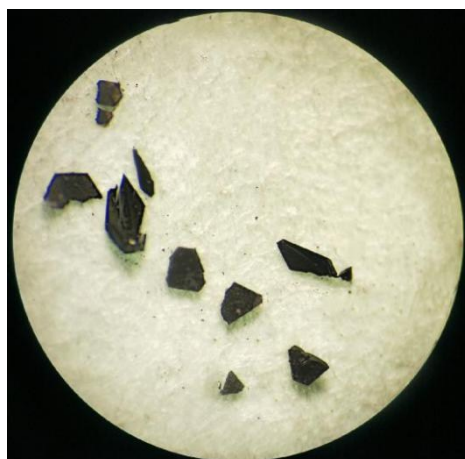

**Figure S1.** An image of Ag<sub>43</sub> crystals (black block) under an optical microscope.

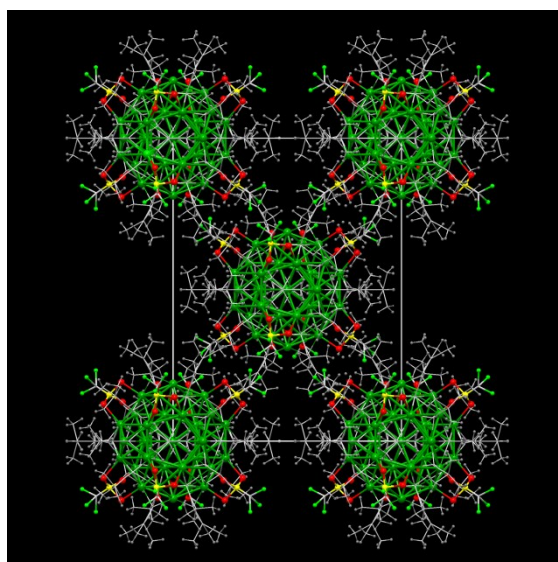

**Figure S2.** Packing of Ag<sub>43</sub> in a unit cell. Color legend: Ag, dark green; S, yellow; O, red; F, light green; C, gray.

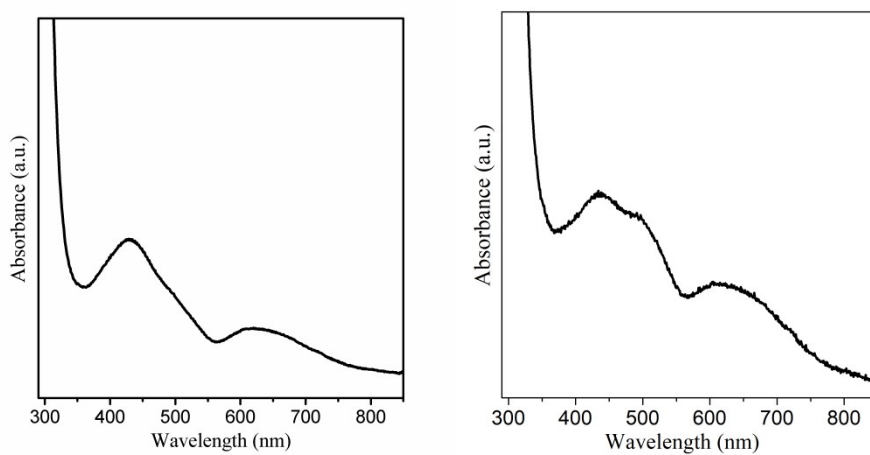

**Figure S3.** The UV-Vis absorption of Ag<sub>43</sub> before (left) and after (right) catalyzing the reaction of silane with H<sub>2</sub>O.

**Table 1.** Crystal data and structure refinement for Ag<sub>43</sub>.

---

|                                             |                                                                                                      |
|---------------------------------------------|------------------------------------------------------------------------------------------------------|
| Identification code                         | Ag <sub>43</sub> ( <sup>t</sup> BuC≡C) <sub>24</sub> (CF <sub>3</sub> SO <sub>3</sub> ) <sub>8</sub> |
| Empirical formula                           | C <sub>154</sub> H <sub>210</sub> Ag <sub>43</sub> F <sub>24</sub> O <sub>24</sub> S <sub>8</sub>    |
| Formula weight                              | 7796.10                                                                                              |
| Temperature/K                               | 150                                                                                                  |
| Crystal system                              | monoclinic                                                                                           |
| Space group                                 | I2/m                                                                                                 |
| a/Å                                         | 19.8306(5)                                                                                           |
| b/Å                                         | 27.6106(10)                                                                                          |
| c/Å                                         | 20.8093(9)                                                                                           |
| α /°                                        | 90                                                                                                   |
| β /°                                        | 91.117(3)                                                                                            |
| γ /°                                        | 90                                                                                                   |
| Volume/Å <sup>3</sup>                       | 11391.7(7)                                                                                           |
| Z                                           | 2                                                                                                    |
| ρ calcd/cm <sup>3</sup>                     | 2.273                                                                                                |
| μ /mm <sup>-1</sup>                         | 30.120                                                                                               |
| F(000)                                      | 7382.0                                                                                               |
| Crystal size/mm <sup>3</sup>                | 0.25 × 0.25 × 0.25                                                                                   |
| Radiation                                   | CuKα (λ = 1.54184)                                                                                   |
| 2θ range for data collection/°              | 8.5 to 159.84                                                                                        |
| Index ranges                                | -13 ≤ h ≤ 25, -17 ≤ k ≤ 34, -26 ≤ l ≤ 23                                                             |
| Reflections collected                       | 32054                                                                                                |
| Independent reflections                     | 12003 [Rint = 0.0503, Rsigma = 0.0504]                                                               |
| Data/restraints/parameters                  | 12003/1015/650                                                                                       |
| Goodness-of-fit on F <sup>2</sup>           | 1.514                                                                                                |
| Final R indexes [I > 2σ (I)]                | R1 = 0.1238, wR2 = 0.3962                                                                            |
| Final R indexes [all data]                  | R1 = 0.1498, wR2 = 0.4187                                                                            |
| Largest diff. peak/hole / e Å <sup>-3</sup> | 2.08/-1.87                                                                                           |

---

## References

- 1 CrysAlisPro Version 1.171.35.19. 2011. Agilent Technologies Inc. Santa Clara, CA, USA.
- 2 Dolomanov, O. V.; Bourhis, L. J.; Gildea, R. J.; Howard, J. A. K.; Puschmann, H. J Appl. Crystallogr. 2009, 42, 339.
